# Supplementary material
Source: publisher figshare collection journal article supplement (https://sage.figshare.com/ndownloader/files/17435411)
Supplement: Supplementary file 1 [file 17435411]

**Supplement A.** Search strategy and inclusion/exclusion criteria

|                           |                                                                                                                                                                                                                                                                                                                                                                                                                                                                                                                                                                                                                                                                                                                                     |
|---------------------------|-------------------------------------------------------------------------------------------------------------------------------------------------------------------------------------------------------------------------------------------------------------------------------------------------------------------------------------------------------------------------------------------------------------------------------------------------------------------------------------------------------------------------------------------------------------------------------------------------------------------------------------------------------------------------------------------------------------------------------------|
| <b>Search strategy</b>    | paediatric* or pediatric* or child* or infant* or teen* or youth or adolescen*) AND (decision aid* or decision making or decision-making or decision support technique or decision coaching) AND (controlled trial or random allocation or clinical trial* or RCT or comparative study or evaluat* or pilot or feasibility or intervention).                                                                                                                                                                                                                                                                                                                                                                                        |
| <b>Limits</b>             | English language, humans and original journal articles                                                                                                                                                                                                                                                                                                                                                                                                                                                                                                                                                                                                                                                                              |
| <b>Inclusion criteria</b> | <ul style="list-style-type: none"><li>• We included studies that evaluated a child patient/parent health decision-making intervention in the pediatric population, including interventions for parents of neonates, and for parents of soon-to-be-born children.</li><li>• Shared decision-making interventions were defined as any intervention (e.g. decision aid, decision coaching method) targeting any, or all, of the essential elements of Makoul's definition of SDM.</li><li>• We included interventions targeted at 1) healthcare professionals, 2) patients, 3) parents, or 4) a combination. We included any format of intervention evaluation (e.g. randomized control trials, before-after pilot studies).</li></ul> |
| <b>Exclusion criteria</b> | We excluded articles that were not published in a peer-reviewed journal, and studies published in a language other than English.                                                                                                                                                                                                                                                                                                                                                                                                                                                                                                                                                                                                    |

**Supplement B.** Acceptability, knowledge and decision-making instruments from included articles

|   |                      | Feasibility                                |                                                                                  | Knowledge                                            |                                                                                   |                                                                                                                                     | Psychometrically evaluated decision-making instruments                                                          |
|---|----------------------|--------------------------------------------|----------------------------------------------------------------------------------|------------------------------------------------------|-----------------------------------------------------------------------------------|-------------------------------------------------------------------------------------------------------------------------------------|-----------------------------------------------------------------------------------------------------------------|
|   |                      | Number of items                            | Response options                                                                 | Number of items                                      | Response options                                                                  | Analysis                                                                                                                            |                                                                                                                 |
| 1 | Ahmed et al 2017     | Parent:<br>20 items<br><br>HCP:<br>9 items | Parent:<br>3-point scale<br><br>HCP:<br>5-point scale                            | N/A                                                  | N/A                                                                               | N/A                                                                                                                                 | <ul style="list-style-type: none"> <li>Control preferences scale – pediatric</li> </ul>                         |
| 2 | Allingham et al 2018 | Parent:<br>27 items<br><br>HCP:<br>2 items | Parent:<br>Various scales<br><br>HCP:<br>Open-ended + unknown                    | Subjective:<br>7 items<br><br>Objective:<br>10 items | Subjective:<br>5-point scale<br><br>Objective:<br>'yes'/'no'/'not sure            | <ul style="list-style-type: none"> <li>Total summation of correct responses</li> <li>Comparisons of means at time points</li> </ul> | <ul style="list-style-type: none"> <li>Decision Regret Scale</li> </ul>                                         |
| 3 | Al Faleh et al 2011  | Parent:<br>9 items                         | Parent:<br>5-point scale                                                         | Objective:<br>8 items                                | Objective:<br>Did not report                                                      | <ul style="list-style-type: none"> <li>Total summation of correct responses</li> <li>Comparisons of means at time points</li> </ul> | <ul style="list-style-type: none"> <li>Decisional Conflict Scale</li> </ul>                                     |
| 4 | Bejarno et al 2015   | Parent:<br>12 items<br><br>HCP:<br>5 items | Parent:<br>5-point scale + open-ended for two items<br><br>HCP:<br>5-point scale | Objective:<br>5 items                                | Objective:<br>Multiple choice                                                     | <ul style="list-style-type: none"> <li>Total summation of correct responses</li> <li>Comparisons of means at time points</li> </ul> | <ul style="list-style-type: none"> <li>Decision Regret Scale</li> <li>SURE test</li> </ul>                      |
| 5 | Brinkman et al 2013  | N/A                                        | N/A                                                                              | Objective:<br>15 items                               | Objective:<br>'true'/'false'/'don't know' + multiple choice options for two items | <ul style="list-style-type: none"> <li>Total summation of correct responses</li> <li>Comparisons of means between groups</li> </ul> | <ul style="list-style-type: none"> <li>OPTION (involvement scale)</li> <li>Decisional Conflict Scale</li> </ul> |
| 6 | Carlson et al 2017   | Parent:<br>Did not report                  | Parent:<br>Did not report                                                        | N/A                                                  | N/A                                                                               | N/A                                                                                                                                 |                                                                                                                 |

|    |                          |                                             |                                                                                                                                       |                              |                                          |                                                                                                                                         |                                                                                                                                      |
|----|--------------------------|---------------------------------------------|---------------------------------------------------------------------------------------------------------------------------------------|------------------------------|------------------------------------------|-----------------------------------------------------------------------------------------------------------------------------------------|--------------------------------------------------------------------------------------------------------------------------------------|
| 7  | Clark-Pounder et al 2015 | N/A                                         | N/A                                                                                                                                   | N/A                          | N/A                                      | N/A                                                                                                                                     |                                                                                                                                      |
| 8  | Coexter et al 2017       | Parent:<br>5 items                          | Parent: 3-point scale for 4 items + 4-point scale for 1 item                                                                          | Objective:<br>10 items       | Objective:<br>'true'/'false'/ open-ended | <ul style="list-style-type: none"> <li>• Total summation of correct responses</li> <li>• Comparisons of means between groups</li> </ul> | <ul style="list-style-type: none"> <li>• Decision self-efficacy scale</li> <li>• Decisional conflict scale - low literacy</li> </ul> |
| 9  | Delaney et al 2017       | HCP:<br>interview                           | HCP:<br>interview                                                                                                                     | N/A                          | N/A                                      | N/A                                                                                                                                     |                                                                                                                                      |
| 10 | Feenstra et al 2015      | Parent:<br>9 items<br><br>Child:<br>9 items | Parent:<br>3-point scale for 8 items + 2-point scale for 1 item<br><br>Child:<br>3-point scale for 8 items + 2-point scale for 1 item | N/A                          | N/A                                      | N/A                                                                                                                                     | <ul style="list-style-type: none"> <li>• Dyadic OPTION scale</li> <li>• Decisional conflict scale - low literacy</li> </ul>          |
| 11 | Hess et al 2018          | Parent:<br>6 items<br><br>HCP:<br>3 items   | Parent:<br>2-point scale for 5 items + 3-point scale for 1 item<br><br>HCP:<br>2-point scales                                         | Objective:<br>10 items       | Objective:<br>'true'/'false'/'unsure'    | <ul style="list-style-type: none"> <li>• Total summation of correct responses</li> <li>• Comparisons of means between groups</li> </ul> | <ul style="list-style-type: none"> <li>• Decisional Conflict Scale</li> <li>• OPTION (involvement scale)</li> </ul>                  |
| 12 | Jackson 2011             | N/A                                         | N/A                                                                                                                                   | Objective:<br>Did not report | Objective:<br>Multiple choice            | <ul style="list-style-type: none"> <li>• Total summation of correct responses</li> <li>• Comparisons of means at time points</li> </ul> | <ul style="list-style-type: none"> <li>• Decisional Conflict Scale</li> </ul>                                                        |
| 13 | Jackson 2010             | Parent:<br>3 items + interview              | Parent:<br>3-point scale + open-ended response                                                                                        | Objective:<br>Did not report | Objective:<br>Did not report             | <ul style="list-style-type: none"> <li>• Total summation of correct responses</li> <li>• Comparisons of means at time points</li> </ul> | <ul style="list-style-type: none"> <li>• Decisional Conflict Scale</li> </ul>                                                        |
| 14 | Johnston et al           | Parent:                                     | Parent:                                                                                                                               | Objective:                   | Objective:                               | • Total summation of                                                                                                                    | • Decisional Conflict Scale                                                                                                          |

|    |                      |                                                    |                                                                                                                    |                                                                                                                                   |                                                                                 |                                                                                                              |                                                               |
|----|----------------------|----------------------------------------------------|--------------------------------------------------------------------------------------------------------------------|-----------------------------------------------------------------------------------------------------------------------------------|---------------------------------------------------------------------------------|--------------------------------------------------------------------------------------------------------------|---------------------------------------------------------------|
|    | 2009                 | Did not report                                     | 4-point scale                                                                                                      | 5 items                                                                                                                           | ‘true’/‘false’/‘unsure’                                                         | correct responses<br>• Comparisons of means at time points                                                   |                                                               |
| 15 | Ossebaard 2010       | Parent:<br>Did not report                          | Parent:<br>Did not report                                                                                          | Subjective:<br>Single item                                                                                                        | Subjective:<br>10-point scale                                                   | • Did not report calculation of total score<br><br>• Comparison of means at time points                      | • Decisional Conflict Scale                                   |
| 16 | Parker et al 2018    | N/A                                                | N/A                                                                                                                | N/A                                                                                                                               | N/A                                                                             | N/A                                                                                                          | • Decisional Conflict Scale                                   |
| 17 | Robertson et al 2018 | Parent:<br>Interview<br><br>HCP:<br>Interview      | Parent:<br>Interview<br><br>HCP:<br>Interview                                                                      | N/A                                                                                                                               | N/A                                                                             | N/A                                                                                                          |                                                               |
| 18 | Robertson et al 2019 | Parent:<br>23 items<br><br>Adolescent:<br>22 items | Parent:<br>2-10 point scale + 1 open-ended response<br><br>Adolescent:<br>2-10 point scale + 1 open-ended response | Parent<br>Objective:<br>17 items<br>Subjective:<br>12 items<br><br>Adolescent<br>Objective:<br>13 items<br>Subjective:<br>7 items | Objective:<br>‘Agree’, ‘disagree’, ‘unsure’<br><br>Subjective:<br>5-point scale | Objective<br>• odds ratios via a logistic regression model<br><br>Subjective<br>• Wilcoxon signed rank tests | • Decisional Conflict Scale<br>• Decision Regret Scale        |
| 19 | Sajeev et al 2017    | Parent:<br>9 items<br><br>HCP:<br>34 items         | Parent:<br>4-point scale<br><br>HCP:<br>5-point scale                                                              | Subjective:<br>4 items                                                                                                            | Subjective:<br>4-point scale                                                    | • Perceived improvement in understanding post-intervention                                                   | • Decision Regret Scale<br>• Satisfaction with Decision Scale |
| 20 | Shirley et al 2015   | Parent:<br>12 items                                | Parent:<br>5-point scale + 2 open-ended responses                                                                  | Objective:<br>5 items                                                                                                             | Objective:<br>Multiple choice                                                   | • Total summation of correct responses<br>• Comparisons of means                                             | • SURE test                                                   |

|    |                          |                           |                           |                        |                               |                                                                                                                                         |                                                                                                                                          |
|----|--------------------------|---------------------------|---------------------------|------------------------|-------------------------------|-----------------------------------------------------------------------------------------------------------------------------------------|------------------------------------------------------------------------------------------------------------------------------------------|
|    |                          | HCP:<br>5 items           | HCP:<br>5-point scale     |                        |                               | at time points                                                                                                                          |                                                                                                                                          |
| 21 | Shourie et<br>2013       | N/A                       | N/A                       | Objective:<br>11 items | Objective:<br>Multiple-choice | <ul style="list-style-type: none"> <li>• Total summation of correct responses</li> <li>• Comparisons of means at time points</li> </ul> | <ul style="list-style-type: none"> <li>• Decisional Conflict Scale</li> </ul>                                                            |
| 22 | Westermann<br>et al 2013 | Parent:<br>Did not report | Parent:<br>Did not report | N/A                    | N/A                           | N/A                                                                                                                                     | <ul style="list-style-type: none"> <li>• Decisional Conflict Scale</li> <li>• Provider Decision Process Assessment Instrument</li> </ul> |
| 23 | Wroe 2005                | Parent:<br>3 items        | Parent:<br>0 – 100        | N/A                    | N/A                           | N/A                                                                                                                                     | <ul style="list-style-type: none"> <li>• Satisfaction with Decision Scale</li> </ul>                                                     |

Note. HCP=healthcare professional; N/A=not assess
